# Supplementary material
Source: publisher site journal article supplement (https://www.dovepress.com/article/412912)
Supplement: Supplementary file 1 [file get_supplementary_file.php]

**Supplementary materials**

***Table S1: Metacognitive awareness inventory scoring in medical students (MAI)***

| Question | Value | Question | Value | Question | Value |
| --- | --- | --- | --- | --- | --- |
| (n = 202) | (n. %) | (n = 202) | (n. %) | (n = 202) | (n. %) |
| Q 1 |  | Q19 |  | Q36 |  |
| No | 21 (10.4%) | No | 23 (11.4%) | No | 38 (18.8%) |
| Yes | 181 (89.6%) | Yes | 179 (88.6%) | Yes | 164 (81.2%) |
| Q2 |  | Q20 |  | Q37 |  |
| No | 14 (6.9%) | No | 102 (50.5%) | No | 101 (50.0%) |
| Yes | 188 (93.1%) | Yes | 100 (49.5%) | Yes | 101 (50.0%) |
| Q3 |  | Q21 |  | Q38 |  |
| No | 40 (19.8%) | No | 27 (13.4%) | No | 64 (31.7%) |
| Yes | 162 (80.2%) | Yes | 175 (86.6%) | Yes | 138 (68.3%) |
| Q4 |  | Q22 |  | Q39 |  |
| No | 33 (16.3%) | No | 42 (20.8%) | No | 34 (16.8%) |
| Yes | 169 (83.7%) | Yes | 160 (79.2%) | Yes | 168 (83.2%) |
| Q5 |  | Q23 |  | Q40 |  |
| No | 33 (16.3%) | No | 43 (21.3%) | No | 37 (18.3%) |
| Yes | 169 (83.7%) | Yes | 159 (78.7%) | Yes | 165 (81.7%) |
| Q6 |  | Q24 |  | Q41 |  |
| No | 34 (16.8%) | No | 77 (38.1%) | No | 52 (25.7%) |
| Yes | 168 (83.2%) | Yes | 125 (61.9%) | Yes | 150 (74.3%) |
| Q7 |  | Q25 |  | Q42 |  |
| No | 47 (23.3%) | No | 31 (15.3%) | No | 44 (21.8%) |
| Yes | 155 (76.7%) | Yes | 171 (84.7%) | Yes | 158 (78.2%) |
| Q8 |  | Q26 |  | Q43 |  |
| No | 37 (18.3%) | No | 48 (23.8%) | No | 25 (12.4%) |
| Yes | 165 (81.7%) | Yes | 154 (76.2%) | Yes | 177 (87.6%) |
| Q9 |  | Q27 |  | Q44 |  |
| No | 52 (25.7%) | No | 53 (26.2%) | No | 57 (28.2%) |
| Yes | 150 (74.3%) | Yes | 149 (73.8%) | Yes | 145 (71.8%) |
| Q10 |  | Q28 |  | Q45 |  |
| No | 61 (30.2%) | No | 84 (41.6%) | No | 37 (18.3%) |
| Yes | 141 (69.8%) | Yes | 118 (58.4%) | Yes | 165 (81.7%) |
| Q11 |  | Q29 |  | Q46 |  |
| No | 26 (12.9%) | No | 56 (27.7%) | No | 17 (8.4%) |
| Yes | 176 (87.1%) | Yes | 146 (72.3%) | Yes | 185 (91.6%) |
| Q12 |  | Q30 |  | Q47 |  |
| No | 124 (61.4%) | No | 24 (11.9%) | No | 39 (19.3%) |
| Yes | 78 (38.6%) | Yes | 178 (88.1%) | Yes | 163 (80.7%) |
| Q13 |  | Q31 |  | Q48 |  |
| No | 29 (14.4%) | No | 47 (23.3%) | No | 40 (19.8%) |
| Yes | 173 (85.6%) | Yes | 155 (76.7%) | Yes | 162 (80.2%) |
| Q14 |  | Q32 |  | Q49 |  |
| No | 49 (24.3%) | No | 56 (27.7%) | No | 32 (15.8%) |
| Yes | 153 (75.7%) | Yes | 146 (72.3%) | Yes | 170 (84.2%) |
| Q15 |  | Q33 |  | Q50 |  |
| No | 25 (12.4%) | No | 94 (46.5%) | No | 49 (24.3%) |
| Yes | 177 (87.6%) | Yes | 108 (53.5%) | Yes | 153 (75.7%) |
| Q16 |  | Q34 |  | Q51 |  |
| No | 58 (28.7%) | No | 62 (30.7%) | No | 33 (16.3%) |
| Yes | 144 (71.3%) | Yes | 140 (69.3%) | Yes | 169 (83.7%) |
| Q17 |  | Q35 |  | Q52 |  |
| No | 125 (61.9%) | No | 48 (23.8%) | No | 19 (9.4%) |
| Yes | 77 (38.1%) | Yes | 154 (76.2%) | Yes | 183 (90.6%) |
| Q18 |  |  |  |  |  |
| No | 48 (23.8%) |  |  |  |  |
| Yes | 154 (76.2%) |  |  |  |  |

202 participants completed answering the MAI questionnaire sheet.

***Table S2. The relationship between type of students and total, knowledge, regulation score of metacognition***

| Variables | Non-military students | Military students | p-value |
| --- | --- | --- | --- |
| n = 50 | n = 152 |
| Totalmetacognitive awareness score | 0.7 (0.6, 0.8) | 0.8 (0.7, 0.9) | <0.001 |
| Knowledgemetacognitive awareness score | 0.6 (0.4, 0.7) | 0.8 (0.6, 0.9) | <0.001 |
| Regulationmetacognitive awareness score | 0.7 (0.6, 0.9) | 0.9 (0.7, 1.0) | <0.001 |

09
